# Supplementary material for: Collective motion of self-propelled chemical garden tubes
Source: Royal Society of Chemistry journal article supplement (doi:10.1039/d2sm00395c), 2022-01-01
Supplement: d2sm00395c3.pdf [file d2sm00395c3.pdf]

## Supporting Information

### Collective motion of self-propelled chemical garden tubes

Pawan Kumar, Qingpu Wang, Dezső Horváth, Ágota Tóth and Oliver Steinbock†

#### Supporting figures

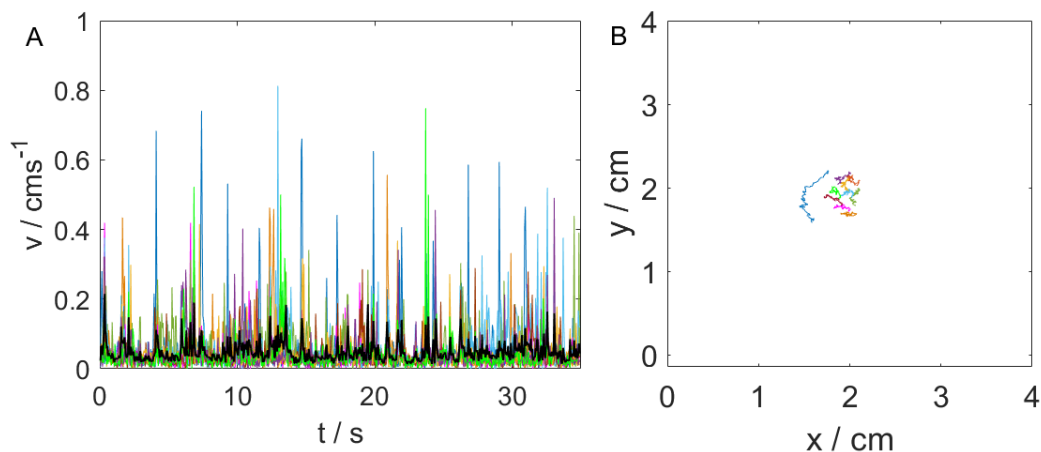

Figure S1: (A) Speed and (B) trajectories of an ensemble of ten tubes after 9 h. Elapsed time: 34.90 s,  $\text{H}_2\text{O}_2$  concentration: 7%. The black curve in (A) represents the average speed of all tubes.

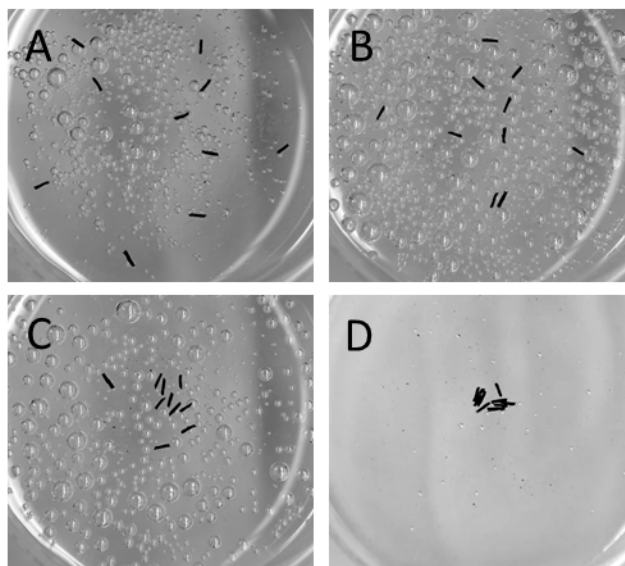

Figure S2: Snapshots of the self-propelled tubes in a thin layer of 7%  $\text{H}_2\text{O}_2$  solution after (A) 15 min, (B) 3 h, (C) 6.5 h, and (D) 1 day. Field of view:  $3.6 \times 3.2 \text{ cm}^2$ .

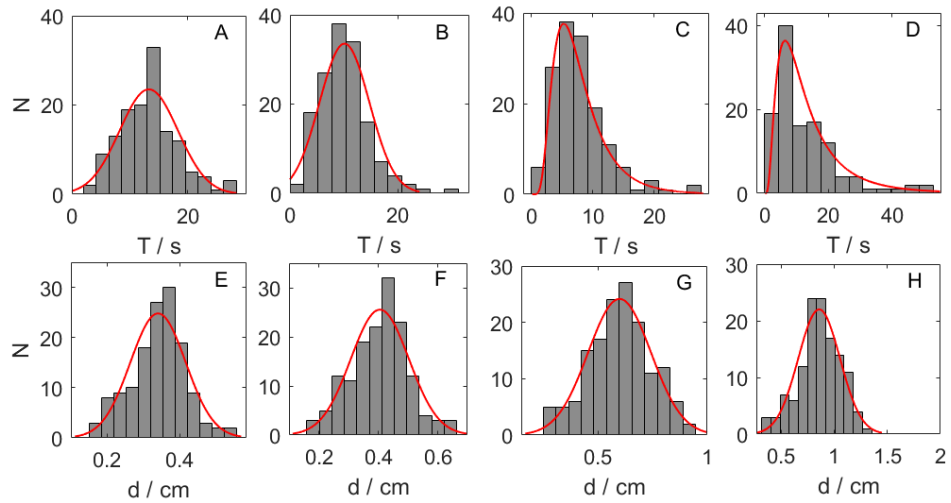

Figure S3: Histograms of the (A-D) period and (E-H) maximal bubble diameter as obtained from experiments with six tubes using (A, E) 2%, (B, F) 3%, (C, G) 5%, and (D, H) 7%  $H_2O_2$ . The red curves are normal and log-normal fits.

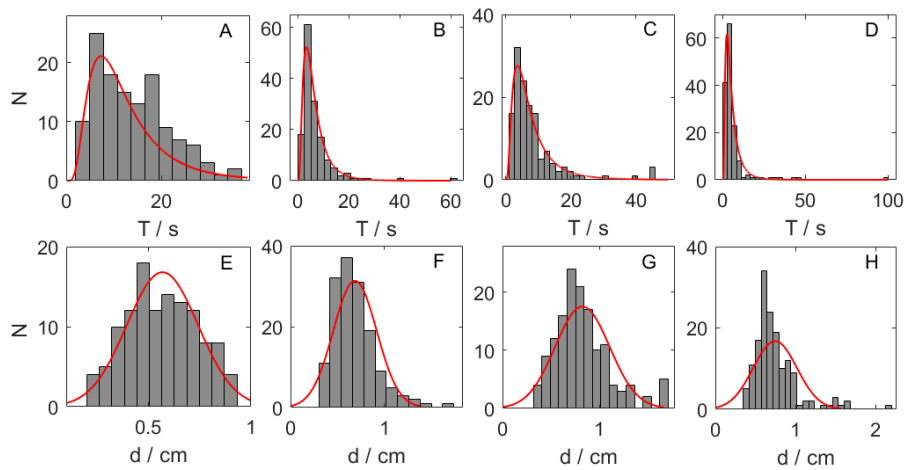

Figure S4: Histograms of the (A-D) period and (E-H) maximal bubble diameter as obtained from experiments with 7%  $H_2O_2$  using (A, E) 3, (B, F) 8, (C, G) 11, and (D, H) 14 tubes. The red curves are normal and log-normal fits.

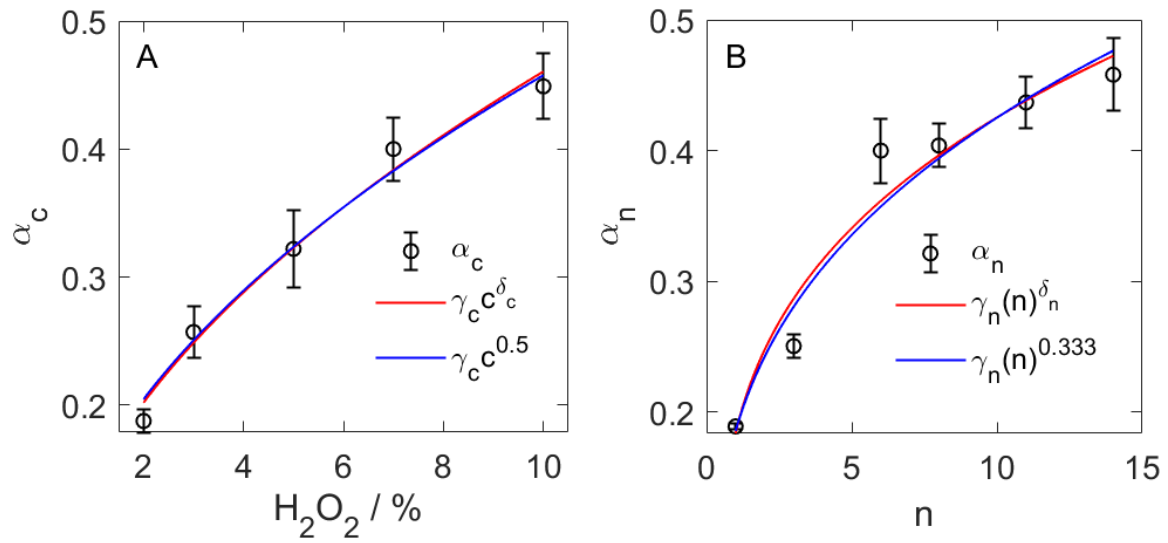

Figure S5: Bubble growth scaling exponent as a function of (A)  $H_2O_2$  concentration (six tubes) and (B) swarm size (7%  $H_2O_2$ ). The floating exponents  $\delta_c$  and  $\delta_n$  (red curves in A, B) were  $0.51 \pm 0.05$  and  $0.34 \pm 0.03$ , respectively.

### Supporting videos:

Movie S1: Self-propulsion of ten chemical garden tubes in a thin layer of 7%  $H_2O_2$  after 15 min, shown at 2X the actual speed.

Movie S2: Rhythmic oscillation of ordered-unordered state of six tubes for 7%  $H_2O_2$ , shown at 2X the actual speed.
